# Supplementary material for: Tocilizumab reduces COVID-19 mortality and pathology in a dose and timing-dependent fashion: a multi-centric study
Source: PubMed Central journal article supplement (PMC8492686; doi:10.1038/s41598-021-99291-z), 2021-10-05
Supplement: 41598_2021_99291_MOESM1_ESM.pdf [file 41598_2021_99291_MOESM1_ESM.pdf]

Tocilizumab reduces COVID-19 mortality and pathology in a dose and timing-dependent fashion: a multi-centric study.

Alejandro Durán-Méndez, Alma Delia Aguilar-Arroyo, Emiliano Vivanco-Gómez, Eduardo Nieto-Ortega, Daniela Pérez-Ortega, Cristian Jiménez-Pérez, Karla Y. Hernández-Skewes, Guillermo Montiel-Bravo, Oscar J. Roque-Reyes, Fernanda Romero-Lechuga, Diana Medina-Santos, Perla Oriana-Román, Jorge Rafael Flores-Hernández, Juan Daniel Méndez-Coca, Daniela Montaña-Olmos, Karla Cecilia Farfán-Lazos, Miranda Tobón-Cubillos, América Viveros-Hernández, Fernando Sevilla-Castillo, Ángel Raúl Hernández-Romero, Shannat Ortega-Rodríguez, Aldo Christiaan Jardínez-Vera, María Antonieta Solís-González, Antonio Ramos de la Medina, Laura Martínez Pérez-Maldonado, Elizabeth Lagunes-Lara, Miguel Cova-Bonilla, Alberto N. Peón

Supplementary Table S1. Dosing strategy.

|                       | <i>&lt;400 mg of<br/>Tocilizumab</i> | <i>400-800<br/>mg of<br/>Tocilizumab</i> | <i>&gt;800 mg of<br/>Tocilizumab</i> | <i>Average<br/>dose</i> | <i>Patients<br/>receiving<br/>adittional<br/>doses</i> |
|-----------------------|--------------------------------------|------------------------------------------|--------------------------------------|-------------------------|--------------------------------------------------------|
| <i>Critically-ill</i> | 2 (22.2%)                            | 2 (22.3%)                                | 5 (55.5%)                            | 790 mg                  | 22%                                                    |
| <i>Severely-ill</i>   | 5 (12.8%)                            | 24 (61.5%)                               | 10 (25.6%)                           | 790 mg                  | 26%                                                    |
| <i>Moderately-ill</i> | 8 (25.8%)                            | 18 (58%)                                 | 5 (16.12%)                           | 550 mg                  | 24%                                                    |
